CORRECTION

# Correction: PSG9 Stimulates Increase in FoxP3<sup>+</sup> Regulatory T-Cells through the TGF-β1 Pathway

The *PLOS ONE* Staff

## Notice of Republication

This article was republished on February 10, 2017, to correct figure errors that were introduced during the composition process. The publisher apologizes for the errors. Please download this article again to view the correct version. The originally published, uncorrected article and the republished, corrected article are provided here for reference.

## Supporting information

**S1 File. Originally published, uncorrected article.**

(PDF)

**S2 File. Republished, corrected article.**

(PDF)

## Reference

1. Jones K, Ballesteros A, Mentink-Kane M, Warren J, Rattila S, Malech H, et al. (2016) PSG9 Stimulates Increase in FoxP3<sup>+</sup> Regulatory T-Cells through the TGF-β1 Pathway. *PLoS ONE* 11(7): e0158050. <https://doi.org/10.1371/journal.pone.0158050> PMID: 27389696

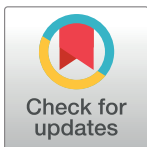

## OPEN ACCESS

**Citation:** The *PLOS ONE* Staff (2017) Correction: PSG9 Stimulates Increase in FoxP3<sup>+</sup> Regulatory T-Cells through the TGF-β1 Pathway. *PLoS ONE* 12(4): e0175636. <https://doi.org/10.1371/journal.pone.0175636>

**Published:** April 6, 2017

**Copyright:** © 2017 The PLOS ONE Staff. This is an open access article distributed under the terms of the [Creative Commons Attribution License](https://creativecommons.org/licenses/by/4.0/), which permits unrestricted use, distribution, and reproduction in any medium, provided the original author and source are credited.
